# Supplementary material for: Loading an organophosphorous flame retardant into halloysite nanotubes for modifying UV-curable epoxy resin
Source: Royal Society of Chemistry journal article supplement (doi:10.1039/c6ra08178a), 2016-01-01
Supplement: c6ra08178a1.pdf [file c6ra08178a1.pdf]

## Supplementary information

### Loading organophosphorous flame retardant to halloysite nanotubes for modifying UV-curable epoxy resin

Tiancheng Zheng, Xiuyuan Ni \*

State Key Laboratory of Molecular Engineering of Polymer, Department of Macromolecular Science, Fudan University, Shanghai 200433, PR China

\* Corresponding author. Tel: +86-21-65640982. Fax: +86-21-65640293.

E-mail address: xyni@fudan.edu.cn.

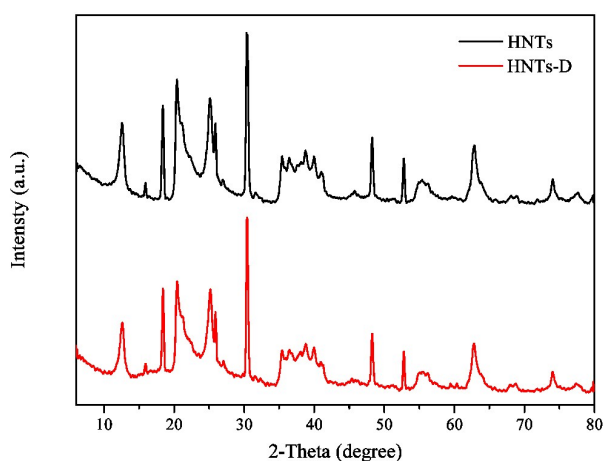

**Fig. S1** The XRD curves of HNTs and HNTs-D

The X-ray diffraction spectra of both HNTs and HNTs-D are provided as Fig. S1. On comparison, no changes are found in characteristic peaks of halloysite nanotubes over the range from 6° to 15° for 2 $\theta$ , which is related to the wall spacing of halloysite nanotubes.
